1 *The use of social information in vulture flight decisions*

2

3 Sassi Yohan <sup>a,\*</sup>, Nouzières Basile <sup>b</sup>, Scacco Martina <sup>c,d</sup>, Tremblay Yann <sup>e</sup>, Duriez

4 Olivier <sup>a,§</sup>, Robira Benjamin <sup>f,§</sup>

5 a: CEFE, Univ Montpellier, CNRS, EPHE, IRD, Montpellier, France

6 b: Rocher des Aigles, Rocamadour, France

7 c: Max Planck Institute of Animal Behavior, Department of Migration, Am Obstberg 1, 78315,

8 Radolfzell, Germany

9 d: Department of Biology, University of Konstanz, Universitätsstraße 10, 78464, Konstanz, Germany

10 e: Marine Biodiversity Exploitation and Conservation (MARBEC), University of Montpellier, CNRS,

11 Ifremer, IRD, 34203 Sète, France

12 f: Department of Biodiversity and Molecular Ecology, Research and Innovation Centre, Fondazione

13 Edmund Mach, San Michele all'Adige, Italy

14

15 \* Corresponding author: [yoh.sassi22@gmail.com](mailto:yoh.sassi22@gmail.com) , CEFE, 1919 Routes de Mende, 34293 Montpellier  
16 cedex 5, France, +33 6 59 06 16 52.

17 § Co-last authors

## 18 Abstract

19 Animals rely on a balance of personal and social information to decide when and where to  
20 move next in order to access a desired resource, such as food. The benefits from cueing on  
21 conspecifics to reduce uncertainty about resources availability can be rapidly overcome by the  
22 risks of within-group competition, often exacerbated toward low-ranked individuals. Being  
23 obligate soarers, relying on thermal updrafts to search for carcasses around which competition  
24 can be fierce, vultures represent ideal models to investigate the balance between personal and  
25 social information during foraging movements. Linking dominance hierarchy, social affinities  
26 and meteorological conditions to movement decisions of eight captive vultures, *Gyps spp.*,  
27 released for free flights in natural-like soaring conditions, we found that they relied on social  
28 information (i.e. other vultures using/having used the thermals) to find the next thermal updraft,  
29 especially in unfavourable flight conditions. Low-ranked individuals were more likely to  
30 disregard social cues when deciding where to go next, possibly to minimise the competitive  
31 risk of social aggregation. These results exemplify the architecture of decision-making during  
32 flight in social birds. It suggests that the environmental context, the context of risk and the  
33 social system as a whole calibrate the balance between personal and social information use.

34

35 **Key-words:** griffon vulture, hierarchy, movement decision, landscape exploration, social information,  
36 unpredictable resource

## 37 1. Introduction

38           Animals must constantly decide where and when to move next in order to find resources  
39 such as food, water, shelter, or a mate, necessary for life. To make these decisions, they can  
40 rely on two sources of information: personal information and social information. Personal  
41 information includes knowledge of the spatiotemporal patterns of resource distribution that  
42 individuals may perceive or have memorised from previous encounters [1]. For example, food-  
43 storing birds are able to return to locations where they stored or saw food in the past, based on  
44 prior expectation of the resource availability [2]. Social information, on the other hand, is  
45 obtained by observing the behaviour of others [3–5]. Feeding, fleeing, or mating individuals  
46 provide discrete information about the availability and locations of food, predators, or potential  
47 mates.

48           For resources that are heterogeneously distributed in the environment, ephemeral and  
49 unpredictable, using only personal information for movement decisions may be prone to  
50 inaccuracies [6]. In such conditions, social animals may benefit from companions' knowledge  
51 and may follow the dominant or oldest individual(s) considered as knowledgeable (e.g. homing  
52 pigeons, *Columba livia*, or elephants, *Loxodonta africana*, [7,8]), follow the largest group  
53 through shared decision-making [9], or stay with preferred affiliates [10–12]. Because using  
54 social information can considerably reduce uncertainty in finding resources, individuals should  
55 favour this source of information to achieve cost-efficient movement [13–15]. However,  
56 relying heavily on social information can also lead individuals to aggregate on resources,  
57 potentially inducing competition by exploitation or interference if the resource is  
58 monopolizable and depletable [16]. Since both social and personal information are often  
59 available to social animals [1], they need to balance their relative importance, depending on  
60 the availability and predictability of the resource. When deciding on the next movement step,  
61 social animals must trade-off the decreased uncertainty of locating a resource through social  
62 information, with the potential increase in competition risk. Such a balance may be dictated by  
63 the immediate needs of the individual and its risk sensitivity [17] but also by the group social  
64 organisation. For example, low-ranked individuals are known to suffer more from within-group  
65 competition compared to high-ranked individuals [18] and should therefore be more reluctant  
66 to engage into social information use, which could eventually trigger proximity to despotic  
67 individuals [19].

68           Vultures rely on two unpredictable resources: carcasses to feed and thermal updrafts to  
69 move. During foraging flights, these large soaring birds gain altitude by circling into thermal

70 updrafts (i.e. masses of hot air rising from heated surfaces) and glide across the landscape to  
71 the next updraft while scanning the ground for carcasses [20]. Although some topographic  
72 features are clearly favourable to updrafts presence [21], at the individual level, challenging  
73 local meteorological conditions (e.g. high wind speed, low temperature, high cloudiness) can  
74 make thermal locations and availability hard to predict [22]. If they fail to detect an updraft,  
75 vultures may be forced to switch to flapping flight, or worse to land and take-off again,  
76 significantly increasing their energy expenditure [23,24]. While both thermals and carcasses  
77 are relatively unpredictable, thermals are not depletable contrary to carcasses. When a vulture  
78 discovers a carcass, its sharp drop in altitude while circling before landing is used as a signal  
79 by conspecifics, dragging tens of individuals to the food source in a few minutes [25,26]. As  
80 the number of vultures around the carcass increases (up to 100-120 individuals, [27,28]),  
81 individual feeding rates decrease due to reduced access to the resource, resource depletion by  
82 competitors and increased agonistic interactions [27]. Therefore, in these social birds,  
83 individuals should balance the advantage of conspecific presence to locate thermal updrafts  
84 [29] with the ultimate cost of competition around the carcasses that can be fierce [30–33]. As  
85 such, vultures are ideal models to investigate the role of conspecifics in shaping their foraging  
86 movement decisions.

87       Using a group of captive but freely-flying ‘griffon’ vultures, *Gyps fulvus* and *G.*  
88 *rueppellii*, tagged with high-resolution GPS loggers, we studied how conspecifics’ presence  
89 shapes individuals’ movement decisions during soaring flights. Despite being trained birds  
90 released for public shows, these individuals sometimes detected and fed on carcasses at  
91 surrounding farms (BN and YS, pers. obs.). We therefore consider these flights comparable to  
92 natural foraging flights. Focusing on the movement steps from thermal to thermal, we first  
93 assessed when do individuals preferentially discover new thermals (i.e. use of personal  
94 information) compared to using thermals already discovered by conspecifics (i.e. use of social  
95 information). We expected that vultures would favour the use of social information when  
96 unfavourable meteorological conditions increased thermal unpredictability and when flight  
97 conditions (e.g. low altitude) increased risks of landing [1]. Furthermore, given the hierarchy  
98 in vulture groups, we expected low-ranked individuals to be more prone to use personal  
99 information than high-ranked individuals to try to find the food source first, in order to avoid  
100 large aggregation [34,35]. Second, we investigated the drivers underlying thermal selection  
101 when individuals had to choose between simultaneously available thermals. We expected  
102 individuals to select thermals providing the maximal positive vertical speed (i.e. climb rate) as  
103 it may provide a reliable proxy of the thermal current strength helping them maximise their

104 height gain [29]. To decrease uncertainty about resource finding and risks mentioned above,  
105 we expect that individuals should favour thermals hosting the maximum number of individuals  
106 to maintain cohesion and secure the possibility to cue on as many conspecifics as possible [29].  
107 Finally, social preferences may also influence decision, with individuals preferentially moving  
108 together with preferred affiliates [12,36,37], as it could reduce competition due to familiarity  
109 between individuals [38].

## 110 2. Materials and methods

### 111 2.1 Study site, vultures housing conditions and experimental settings

112 The study was carried out in 2021 and 2022 at the Rocher des Aigles falconry centre,  
113 Rocamadour, France, and divided between winter and summer periods each year. During  
114 winters, vultures were housed within an aviary (6.7 x 6 x 6 m) equipped with four perches:  
115 three of them measuring 3.10 m, placed at 1.7, 2.6 and 3.5 m from the ground, and one of the  
116 full width of the aviary at 4 m height. This setting was used to estimate vulture social bonds  
117 (see Social bond estimation). In addition, besides being fed daily on small pieces of meat to  
118 prevent conflicts, five feeding events (one each week during a five-week period) were  
119 organised in the aviary on a butchery carcass occurring after a one-day fasting (to motivate  
120 feeding). These feeding events were used to assess dominance hierarchy within the group (see  
121 Hierarchy estimation). In summer, these trained vultures were kept perching on individual logs,  
122 released several times per day to execute free flight shows for the public within a landscape  
123 composed of plateaus interspaced by canyons, similar to “Causses” landscape typically used  
124 by french wild vultures [39]. The falconry centre is located near a 120 m-deep canyon and  
125 offers natural soaring conditions for raptors, making this study site a great place to investigate  
126 natural group flight behaviour (see Group flights), [24].

127 We used GPS data and visual observations to characterise the social and flight  
128 behaviour of eight captive vultures (7 Eurasian griffon vultures, *Gyps fulvus*, and 1 closely-  
129 related Rüppell’s vulture, *Gyps rueppellii*), including five females and three males (Table S1).  
130 Each year, we conducted experiments on a group of six individuals (two griffon vultures were  
131 replaced in 2022, Table S1). Experiments followed the animal ethic guidelines of France and  
132 the Centre National de la Recherche Scientifique. Handling of birds to fit GPS loggers followed  
133 the protocol of telemetry study of vultures authorised in the Programme Personnel 961,  
134 coordinated by OD, under the supervision of the French ringing centre, CRBPO, Paris.

135 Furthermore, experiments, observations, handling and flight events were systematically  
136 performed under the guidance of the head of animal caretakers, BN.

### 137 2.1.1 Social bond estimation

138 During five weeks in both years (December/January 2020-2021 and  
139 November/December 2021), we recorded pictures of vultures in the aviary from 8:00 to 19:00  
140 (local time) at 5 minutes interval, using three camera traps (Wosport Big Eye D3 and Reconyx  
141 HyperFire HC600).

142 We identified birds using repeated colours on plastic rings and marks on the ruff and  
143 backhead feathers, using harmless colour sticks (Raidex GmbH, Figure 1A). We then processed  
144 recorded pictures to extract the individuals' ID and position (bill or head position), using a  
145 purpose-built image annotation program in Julia software, JuliaHub Inc., [39]. For subsequent  
146 analyses, we relied on R software (v 4.2.2, R software, 2022, [40]).

147 We considered the social bond between a dyad of individuals  $i$  and  $j$  based on spatial  
148 proximity following the Simple Ratio association Index (SRI, equation 1, [41,42])

149 Equation 1:  $SRI_{i,j} = SRI_{j,i} = \frac{n_{tog}}{n_{tot}}$ ,

150 where  $n_{tog}$  is the number of pictures in which individuals  $i$  and  $j$  were on the same perch at a  
151 Euclidean distance of less than 1.55 m and  $n_{tot}$  is the total number of pictures in which  
152 individuals  $i$  and  $j$  were both detected on the same perch. SRI values varied between 0 and 1,  
153 where 0 represented dyads that were never seen associated and 1 represented dyads that were  
154 always observed sitting at less than 1.55 m from each other. The distance of 1.55 m was chosen  
155 as matching to the mode of the inter-individual distances distribution (Figure S1). This was  
156 also consistent with the aviary setting, as it corresponded to half the length of most available  
157 perches. Our analyses were robust to other choices for this distance threshold (see  
158 Supplementary Material, ESM01).

### 159 2.1.2 Hierarchy estimation

160 Each winter, we estimated hierarchy within the vulture group by monitoring feeding  
161 interactions during the five carcass-based feeding events in the aviary (10 in total, Figure 1B)  
162 using a remotely-controlled video camera (GoPro Hero 4, GoPro Inc.) fixed at 2 m height on  
163 the aviary wall. These feeding events lasted on average 34 min (SD  $\pm$  4 min).

164

165 We computed individuals' rank relying on the randomised Elo-rating approach [43,44],  
166 which accounts for potential temporal instability of the rank using permutations in the agonistic  
167 interaction series ('elo\_scores' function, *aniDom* package, [44,45]; using 1000 randomisations  
168 and fixing the rank adjustment speed along the series, K-factor, to 200). The interaction series  
169 consisted in identifying the "wins" and "losses" for a given individual in agonistic interactions  
170 [46] with other individuals in each video (annotated with BORIS video analysis software, [47]).  
171 We used the ethograms from Bose & Sarrazin (2007, [30]) and Valverde (1959, [48]) to  
172 characterise griffon vulture feeding behaviour and between-individual interactions. An  
173 individual won the interaction when it interrupted another individual's feeding bout (by pecking  
174 it, displacing it or engaging in a fight), and finally accessed the carcass before its opponent. In  
175 other cases, the interaction was considered as a "loss" for the initiator. We assessed the  
176 reliability of the dominance hierarchy through individual Elo-rating repeatability  
177 ('estimate\_uncertainty\_by\_repeatability' function, *aniDom* package, [44]).

### 178 2.1.3 Group flights

179 We recorded vulture flights decisions during 42 flight sessions (21 sessions each year)  
180 in the vicinity of the Rocher des Aigles. In general, birds were released for a flight session three  
181 times per day (in rare occasions from 2 to 4 times), at around 11:00, 14:30 and 16:00 (local  
182 time) for a mean duration of 26.03 min (SD  $\pm$  14.15 min) of flight. These captive vultures are  
183 trained to fly freely, searching for thermals, gaining altitude and coming back to their trainers  
184 (Supplementary Video 1). Vultures were equipped with a high-resolution GPS logger (4 Hz,  
185 TechnoSmart, models Gipsy 1, Gipsy 5 or Axytreck) positioned at their lower back using a  
186 Teflon leg-loop harness (Figure 1C, [49]). They were released in two groups, built according  
187 to social preferences with the three most socially-bonded birds together, at 2-min intervals.  
188 Release order alternated between consecutive days. For each flight session, we recorded and  
189 considered as stable the cloudiness (i.e. the proportion of clouds covering the sky, on a scale  
190 from 0 - no clouds - to 8 - sky fully covered by clouds), horizontal wind speed and temperature  
191 (all extracted from meteofrance.com based on local meteorological models).

192 To further investigate how vulture thermal choices were shaped by personal and social  
193 information, we pre-processed flight tracks in three consecutive steps. We subsampled  
194 individuals' tracks from 4 to 1 GPS fix per second, and segmented their flight behaviour into  
195 gliding, linear soaring and circular soaring. We then created spatio-temporally dynamic maps  
196 of thermal availability based on the spatial clustering of individual's circular soaring phases.  
197 Leaning on these maps, we retraced the history of thermal use/choice by individuals.

### 198 2.1.3.1 Thermal use identification

199 To segment vulture flight between circular soaring, linear soaring and gliding flight we  
200 first calculated turning angle and vertical speed between consecutive locations using the *move*  
201 R package [50]. We applied a moving window of 30 s to calculate the absolute cumulative sum  
202 of the turning angles (hereafter cumulative turning angle) and a moving window of 5 s to  
203 calculate the average vertical speed. We then applied a k-means approach ( $k = 2$ , ‘kmeans’  
204 function, *stats* R package) on the smoothed vertical speed (positive speed when flying upwards)  
205 to distinguish between soaring (ascending flight) and gliding (descending flight, [51,52]). We  
206 further classified soaring locations into circular soaring (indicating use of thermal updrafts) and  
207 linear soaring (also called slope soaring, expected to occur outside of thermals), with circular  
208 soaring being associated with a cumulative turning angle  $\geq 300$  degrees. A result of  
209 segmentation is illustrated in Figure 2B. Finally, we inferred the use of a thermal when the  
210 individual engaged in circular soaring for more than 30 s, with no interruption of more than 5  
211 s of gliding.

### 212 2.1.3.2 Dynamic mapping of available thermals

213 Within each flight session, we created a dynamic map of thermals (Figure 3). First, we  
214 spatially clustered vulture circular soaring locations (reflecting the use of the same thermal  
215 updraft) independently of time by using a 3D density-based spatial clustering approach  
216 (‘dbscan’ function, *dbscan* R package, [53]). This algorithm relies on a spherical  
217 neighbourhood to perform density-based neighbour joining, i.e. clustering (Figure 2C). We  
218 assumed this neighbourhood to be of a 40-m radius, and a minimum number of five locations  
219 within this range for the algorithm to consider the neighbourhood further. This 40 m threshold  
220 corresponded to the largest 4-nearest-neighbour distance observed when considering locations  
221 attributed to thermal use only (‘kNNdistplot’ function, *dbscan* R package) and matched with  
222 empirical expectations of radius during circular soaring phases [54].

223 We then made those maps dynamic in time by considering the lifetime of each thermal.  
224 We considered a thermal as “available” from the moment when the first individual entered it  
225 until the last individual left it (Figure 3).

## 226 2.2 Statistical analyses

227 We defined collective flight events as any time of a flight session when at least two  
228 individuals were flying. For each of these events, we first analysed the use of social information  
229 (the tendency to join thermals already discovered by conspecifics) as a function of external



230 (meteorological) and internal drivers (individual traits). We then used step selection functions  
231 to define, at each movement step, which drivers determined the selection of the chosen next  
232 location (thermal updraft) relative to other potential locations.

### 233 2.2.1 Drivers of social information use

234 We investigated the effect of local meteorological context, individual traits and flight  
235 mechanics on the use of social information, defined here as the tendency to join thermals  
236 already discovered by conspecifics. We considered that an individual discovered a thermal  
237 when it was the first, among all individuals, to adopt circular soaring flight into it. For the  
238 analysis, we discarded the discovery of the first thermal in each flight session (as this thermal  
239 was necessarily discovered).

240 To investigate the drivers underlying the use of social information we modelled the  
241 probability to join a thermal already discovered by others using generalised linear mixed  
242 models (GLMMs) with binomial error structure and a logit link function [55]. Our full model  
243 contained the following ten fixed effects: **meteorological variables** with the (i) wind speed  
244 (categorical predictor), (ii) cloudiness and (iii) temperature (both continuous predictors); **social**  
245 **variables** with (iv) the age (continuous predictor) and (v) rank in the dominance hierarchy of  
246 the individual (ordinal categorical predictor), and variables related to the **mechanic of flight**  
247 with (vi) the glide-ratio (horizontal distance travelled during a 1-m altitude loss, only measured  
248 on glides with straightness > 0.95 in each flight), (vii) the altitude of and (viii) the 3D distance  
249 to the exit location from the previous thermal used (all continuous predictors). We also added  
250 (ix) the group in which individuals have been released (first or second group released for the  
251 flight) and (x) the time elapsed since the first individual take-off (continuous predictor) as  
252 control variables. Individual ID was considered as a random factor.

253 To compare the relative importance of the fixed effects we scaled all non-categorical  
254 variables to use their estimate as dimensionless effect size [56]. We examined the significance  
255 of each variable by comparing the goodness of fit of models with and without the variable of  
256 interest using a likelihood ratio test ('drop1' function, *stats* R package). Assumptions required  
257 for these statistical approaches (homoscedasticity, Gaussian distribution of residuals) were  
258 checked with plot diagnosis (histogram of residuals, residual Q-Q plot, distribution of residuals  
259 vs fitted values, *DHARMA* R package, [57]). We also tested for the presence of outliers, and  
260 calculated the variance inflation factor (VIF) to test for collinearity (VIF values  $\geq 3$  suggesting  
261 a strong collinearity [58]). We did not detect collinearity in our predictors (VIF<sub>max</sub> = 1.74)  
262 (Figure S3). Furthermore, we extracted the marginal coefficient of determination ( $R_m^2$ ) and the

263 conditional coefficient of determination ( $R_c^2$ ) which describe, respectively, the proportion of  
264 variance explained by fixed effects and by the fixed and random effects combined [59]. Finally,  
265 as the flight time period, and the tested individuals differed, we cross-compared models fitting  
266 on the two years separately (see Supplementary Material ESM01).

### 267 2.2.2 Drivers of thermal updraft selection

268 To study the drivers underlying thermal selection, we embedded our work in the Step  
269 Selection framework [60]. We considered the series of thermals used by each individual. In  
270 that series, we focused on movement steps involving a flight to a thermal previously (or  
271 currently) used by a conspecific when other thermals were available. Using a conditional  
272 logistic regression, we compared the “chosen” thermal characteristics to those “available” but  
273 not chosen. The conditional logistic regression included seven predictors, respectively  
274 characterising the **thermal profitability** with (i) the distance to it and (ii) maximum vertical  
275 speed reached in the thermals by any individual since the focal individual has been released in  
276 the flight session (continuous predictors), **individual personal experience** considering  
277 whether (iii) the thermal was previously used by the focal individual (binary predictor), and  
278 **social information** with (iv) the presence of the focal individual’s preferred affiliates in the  
279 thermal or not (binary predictor), (v) the number of individuals present in the thermal, (vi) the  
280 weighted mean (by the number of previous visits to the thermal) of the social bond with  
281 individuals that used the thermals, and (vii) the negative cubed difference of ranks between the  
282 focal individual and those in the thermals (all continuous predictors, set to 0 for the two latter  
283 if no individuals used it/were present). We used the negative cubed difference to consider an  
284 attraction-repulsion effect (high rank toward low rank and the opposite respectively) by  
285 translating a linear rank difference to a relative hierarchy scale which enhances large rank  
286 differences. For example, following the curve of the negative cube function, if the difference  
287 of rank was five (e.g. the focal individual is ranked 6<sup>th</sup> - a low rank, a conspecific in another  
288 thermal is ranked 1<sup>st</sup> - a high rank) the probability that the focal individual joined the  
289 conspecific should be drastically decreased, mimicking a repulsion effect.

290 Also for this model, we scaled all non-categorical variables to better compare their  
291 relative importance. We fitted the conditional regression considering all individuals together,  
292 yet considering data stratified at the individual-step level. We finally reported the relative  
293 selection strength (RSS) of significant variables which provides the magnitude of estimated  
294 selection coefficients, holding all other covariates fixed [61,62].

## 295 3. Results

296 Vulture dominance hierarchy was steep (Figure S2) and reliably inferred (individual  
297 Elo-rating repeatability = 0.82 and 0.83 in 2021 and 2022 respectively). The rank orders among  
298 individuals present in both years were relatively consistent and unrelated to sex or age (Table  
299 S1). During the 21 flight sessions performed each year, we identified a total of 520 and 578  
300 thermalling events in 2021 and 2022. On average, 63% (SD  $\pm$  7%, Table S1) of these circular  
301 soaring behaviours took place in thermals discovered by a conspecific.

### 302 3.1 Flight risks and hierarchy shapes the use of social information

303 Our model was significantly better than the null model (considering only control  
304 effects; AIC = 1237.4 and 1412.7 respectively) and explained 30% of the variance (Table S2).  
305 The probability for an individual to use a thermal previously discovered by a conspecific  
306 decreased with temperature (from 0.74 at 17°C to 0.43 at 31°C, Figure 4A, Figure 5A, Table  
307 S2), but tended to increase with cloudiness and wind speed (Figure 4A, Table S2). This  
308 probability dropped also with the distance from the previous thermal and the altitude at which  
309 the bird left it (from 0.63 when being at a distance of 12 m from the last thermal used to 0.16  
310 at a distance of 6776 m and from 0.76 when exiting the last thermal at an altitude of 195 m to  
311 0.039 at 1574 m of altitude, Figure 4A, Figure 5B, C, Table S2). Individuals lower in the  
312 dominance hierarchy were approximately twice as likely to discover new thermals than high-  
313 ranked individuals (Figure 4A, Figure 5D). We did not detect significant effects of age and  
314 glide-ratio on the probability to use thermal previously discovered by conspecifics (Figure 4A,  
315 Table S2). Fitting the same model structure on 2021 and 2022 data separately yielded the same  
316 overall results, suggesting that the observed pattern was robust to changes in hierarchy and  
317 between-year conditions (Figure S4, Table S2).

### 318 3.2 Vultures select thermal updrafts hosting the most conspecifics

319 We identified 178 movement steps where an individual entered a thermal while at least  
320 one other thermal was available simultaneously. Individuals were significantly more likely to  
321 select thermals hosting the largest number of conspecifics at time of decision (Relative  
322 Selection Strength [95% confidence interval] = 27.94 [5.99, 131.63]; Figure 4B, Table S3). On  
323 the contrary, the probability to choose a thermal tended to decrease when the preferred affiliate  
324 was using it. The distance to the previous thermal and the maximal vertical speed reached in  
325 the thermal and whether individuals used this thermal in the past did not significantly affect

326 thermal selection (Figure 4B, Table S3). At time of decision, the difference in dominance ranks  
327 as well as the presence of its preferred affiliate did not drive the individual's probability of  
328 selecting the thermal. This pattern was consistent when considering only movement steps  
329 where individuals had to choose between thermals used at time of decision (N = 61, Figure S5,  
330 Table S3). Furthermore, considering all decision events, the sensitivity analysis on the inter-  
331 individual distance threshold for the social bond strength estimation yielded the same results  
332 (i.e. 1.55 m, 1.30 m and 1 m; see Supplementary Material ESM01, Figure S6, Table S4).

## 333 4. Discussion

334 Using a combination of high-resolution tracking and social structure monitoring, we  
335 identified contextual drivers for the differential weighting of personal and social information  
336 in movement decisions. We showed that vultures' movement decisions predominantly relied  
337 on social information, especially in unfavourable flight conditions that increased thermal  
338 unpredictability or put individuals at risk of undesired landing. Overall, individuals  
339 preferentially joined thermals with the largest number of conspecifics. However, the use of  
340 social information depended on the individual social status: low-ranking individuals were more  
341 inclined to use personal information and discovered more thermals on their own than high-  
342 ranking individuals.

343 We found that low-ranked individuals, likely the ones suffering the most from  
344 interference competition, had higher probabilities of discovering new thermals, thus likely  
345 exploring their environment more intensively than the high-ranked individuals. Such flight  
346 strategy would enable subdominant individuals to reach carcasses first, or at least to arrive at  
347 the beginning of the feeding event when the rate of interference is lower [27] hence avoiding  
348 to loose opportunities due to conformity with conspecific behaviour [64]. From this may  
349 emerge a producer-scrounger dynamic [65,66] wherein the use of personal information from  
350 low-ranked individuals to arrive at food sources with lower competition levels would be  
351 exploited by dominant individuals to reduce their own searching effort [16,66,67]. This is  
352 coherent with previous observations of low-ranked vultures being “pioneers”: the very first  
353 individuals to land and feed on the carcasses before being displaced by high-ranked individuals  
354 arriving afterwards [27]. This influence of dominance on foraging tactics where low-ranked  
355 individuals explore and find food while dominant profit has also been observed in other social  
356 bird species such as common cranes *grus grus*, oystercatcher *Haematopus ostralegus*, house  
357 sparrows, *Passer domesticus*, and barnacle goose, *Branta leucopsis*, [18,67–69]. Eviction of

358 subordinates from food patches has even recently been identified as a trigger for collective  
359 movements [70]. In contrast, in activities where individuals do not experience competition,  
360 such as tool-use learning in chimpanzees, naïve individuals will generally copy dominant (and  
361 knowledgeable) individuals [71]. Our study hence stands as a clear cut illustration of the “copy  
362 when asocial learning is costly” rule [72]: the vulture position in the dominance hierarchy,  
363 through the costs it imposes on access to food, seems to calibrate the balance between the use  
364 of personal and social information in foraging movements. In some cases, however, trading  
365 personal information in favour of social information is inevitable.

366       When the environment is largely unpredictable or whenever using error-prone personal  
367 knowledge can be energetically costly, individuals should tend to eavesdrop, and rely more on  
368 information provided by conspecifics to reduce uncertainty about resources availability  
369 [15,73]. Here, we evidenced both cases. First, vultures prioritised the use of social information  
370 when the temperature was low and tended to when cloudiness and wind speed increased. These  
371 weather conditions may translate into fewer and weaker thermals, drifting into the wind,  
372 making them less predictable [74–78]. Second, they also favoured social information when the  
373 altitude at which they left their previous thermal was low. When exiting a thermal at low  
374 altitude, individuals have limited time to glide to the next thermal before having to shift to  
375 flapping flight to stay aloft, or else landing in an undesired place, which both would add high  
376 energetic cost associated with flapping and take-off [23,24,79,80]. Reaching high altitudes  
377 quickly to avoid this risk may also explain why vultures used more thermals previously  
378 discovered by conspecifics if those were close to the last thermal they used. While vultures are  
379 able to cope with difficult flight conditions (e.g. turbulence and strong wind) by adjusting their  
380 banking angles [55], anticipating such risky events may remain the most efficient way to  
381 maximise the trade-off between time, energy and risk which largely dictates their flight strategy  
382 [81]. Adult individuals, through experience, are generally better at coping with difficult flight  
383 conditions [82], yet we did not evidence an effect of age relative to the use of social  
384 information, as observed in other group living species (e.g. [83]). More than age *per se*, the  
385 familiarity of individuals with a given situation might shape their tendency to rely or not on  
386 social knowledge (e.g. in spider monkeys, *Ateles geoffroyi*, during collective foraging [84]).  
387 The captive individuals tested in this experiment are all adults and fly in the same landscape  
388 every day since their birth, thus they are probably very familiar with the areas favourable to  
389 thermal emergence. This could explain why we did not detect any effect of age on the use of  
390 social information, but also indicates that the relative importance of this source of information  
391 is probably underestimated due to the birds' familiarity with the surroundings. An interesting

392 complementary experiment (though technically difficult) to disentangle the effect of familiarity  
393 with the landscape would be to move the whole group and repeat the experiment in an  
394 unfamiliar area to better estimate the strength of personal versus social information use.

395       When faced with a choice between simultaneously available thermals, the previous  
396 experience of individuals (i.e. whether the thermal was used previously or not by the focal) or  
397 current expertise of the group (i.e., relative age/hierarchy difference) impacted very little  
398 vulture movement decisions compared to other social cues, contrasting with previous findings  
399 from insects to mammals, including birds [85–89]. In the current system, ascending currents  
400 can be very ephemeral phenomena, sometimes only lasting a few minutes [90,91]. Certainly, a  
401 “live report” is therefore better provided by the accumulation of convergent information  
402 sources (i.e. numerous conspecifics, [92]) rather than relying on a unique individual source (i.e.  
403 the individual itself or one reference individual). In that line, and surprisingly, the presence of  
404 one preferred affiliate in a thermal tended to reduce the probability to join it. There is evidence  
405 that social bonds assessed “on the ground” are often unrelated to co-flight preferences [93]. It  
406 therefore questions whether collective flights might be used by vultures to strengthen initially  
407 weak social bonds. Maintaining in-flight bounds can indeed be important, as evidenced in the  
408 migratory behaviour of other soaring bird species to enable accurate collective mapping of the  
409 distribution of uplifts [94,95]. Furthermore, for soaring birds, the presence of conspecifics  
410 should provide not only information on the location and strength of updrafts [20,95] but could  
411 also indicate flight speed and circling radius needed to optimise climb rate, by remaining close  
412 to the centre of the thermal where uplift is highest [55]. Yet, the maximum speed reached by  
413 individuals using the thermal little affected vulture decision choices. Possibly, climb rate or  
414 individual speed are not as easy to assess at a distance, compared to the number of conspecifics.  
415 In other words, vultures tended to favour quantity signals (with the number of conspecifics)  
416 over quality signals (maximal vertical speed) [96]. The “power of the group” may indeed in  
417 turn drive cohesion, which could itself make social information even more profitable [96,97].

418       Altogether, our results provide insights into the architecture of decision-making  
419 during movement in a social bird. It highlighted the trade-offs between personal and social  
420 information these birds have to consider in order to optimise both their flying efficiency and  
421 their foraging success. As a first approximation, we considered social cues as coming from  
422 “conspecifics”. Strictly speaking however, our study included two species, Griffon vulture and  
423 Rüppell’s vulture, albeit phylogenetically close and with similar biology. The one Rüppell’s  
424 vulture in fact, used social information provided by surrounding vultures and did not stand out  
425 as an outlier in its behaviour. It is known that even phylogenetically distant individuals could

426 be an important source of social information, not only about the presence of carcasses [98], but  
427 also about the availability of thermals when sharing the same airspace (e.g. from black kites,  
428 *Milvus migrans*, or common swifts, *Apus apus*, [99,100]). Interactions with heterospecifics can  
429 indeed drastically affect animals' daily life [101], up to shaping the cognitive machinery  
430 underpinning their foraging decisions [102]. How heterospecific cues are used when foraging  
431 remains clearly overlooked. Future studies in this direction could provide valuable insights into  
432 understanding the fundamental rules dictating how animals decide where to go.

## 433 CRediT authors' contributions

- 434 **Yohan Sassi**: Conceptualization, Methodology, Software, Investigation, Formal Analysis,  
435 Visualization, Writing - original draft, Writing - Review & Editing.  
436 **Basile Nousières**: Investigation, Resources.  
437 **Martina Scacco**: Software, Writing - Review & Editing.  
438 **Yann Tremblay**: Conceptualization, Writing - Review & Editing.  
439 **Olivier Duriez**: Conceptualization, Investigation, Supervision, Writing - Review & Editing.  
440 **Benjamin Robira**: Conceptualization, Methodology, Software, Visualization, Validation,  
441 Supervision, Writing - original draft, Writing - Review & Editing

## 442 Declaration of competing interest

- 443 The authors declare to have no conflict of interest

## 444 Data availability

- 445 Scripts for review and supplementary video are available here:  
446 <https://github.com/YohanSassi/UpdraftsDecisions>

- 447 A perennial storage of data and scripts will be provided after revision (e.g. Zenodo, Dryad)

## 448 Acknowledgment

- 449 We thank Dominique Maylin and Raphael Arnaud at Rocher des Aigles as well as all of the  
450 staff for their patience, help and enthusiasm for the project. GPS loggers were provided by  
451 Giacomo Dell'Omo. Camera traps and Gopro video cameras were provided by Aurélien  
452 Besnard, Samuel Caro and Samuel Perret. We also thank Samson Acoca-Pidolle for fruitful  
453 discussions about the statistical analyses.

## 454 Fundings

- 455 This work was supported by the GAIA doctoral school grant, University of Montpellier (YS)  
456 and the Gordon and Betty Moore Foundation (BR).



## 457 Main text figures

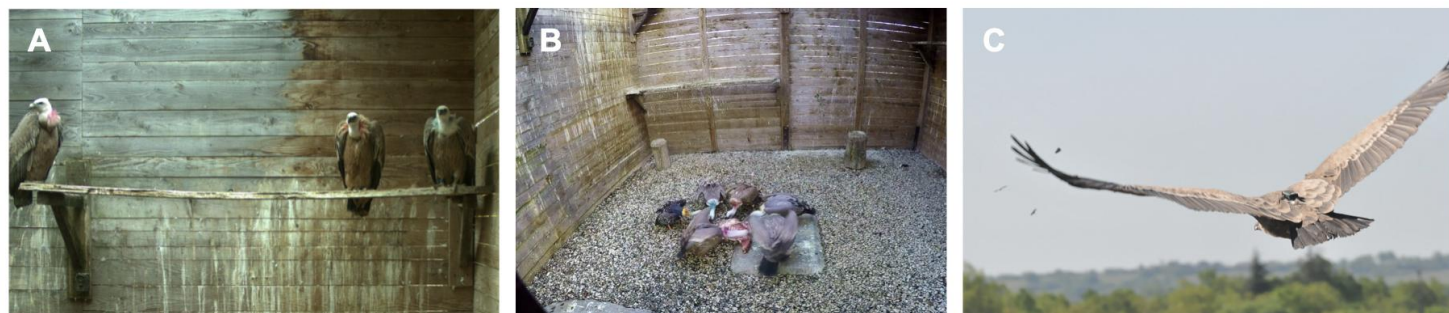

458 **Figure 1. Data collection.** (A) Perched vultures. Distance between vultures during perching  
459 events were used to estimate social-bond strength. (B) Feeding event around a butchery carcass.  
460 Agonistic interactions during those feeding events were used to estimate dominance hierarchy.  
461 (C) Flying vulture. Vultures were released for free flight into a 120-m canyon, equipped with  
462 high-resolution GPS loggers.

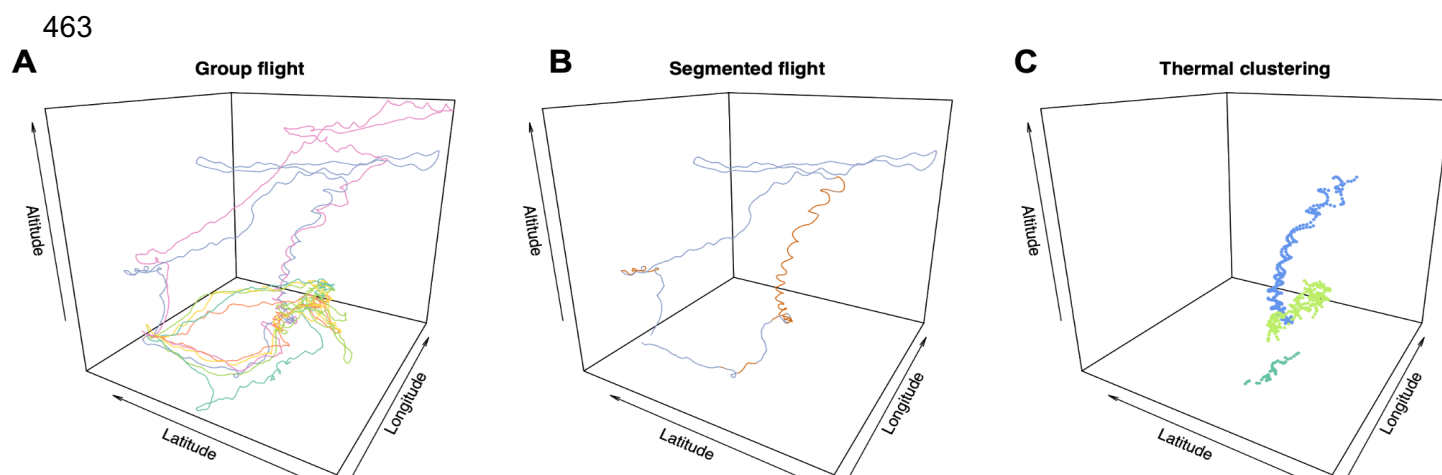

464 **Figure 2. Flight data pre-processing.** Pre-processing steps of group flight GPS data, example  
465 of one flight session. The altitude ranges from 200 m to 600 m. (A) shows a group flight (see  
466 Supplementary Video 1), with colours corresponding to each individual. (B) illustrates the  
467 segmentation of an individual's flight (blue individual in (A)), with the orange segments  
468 corresponding to circular soaring phases. (C) illustrates the 3D density-based spatial clustering  
469 of individuals circular soaring phases, with colours indicating the three thermals identified in  
470 this flight session.

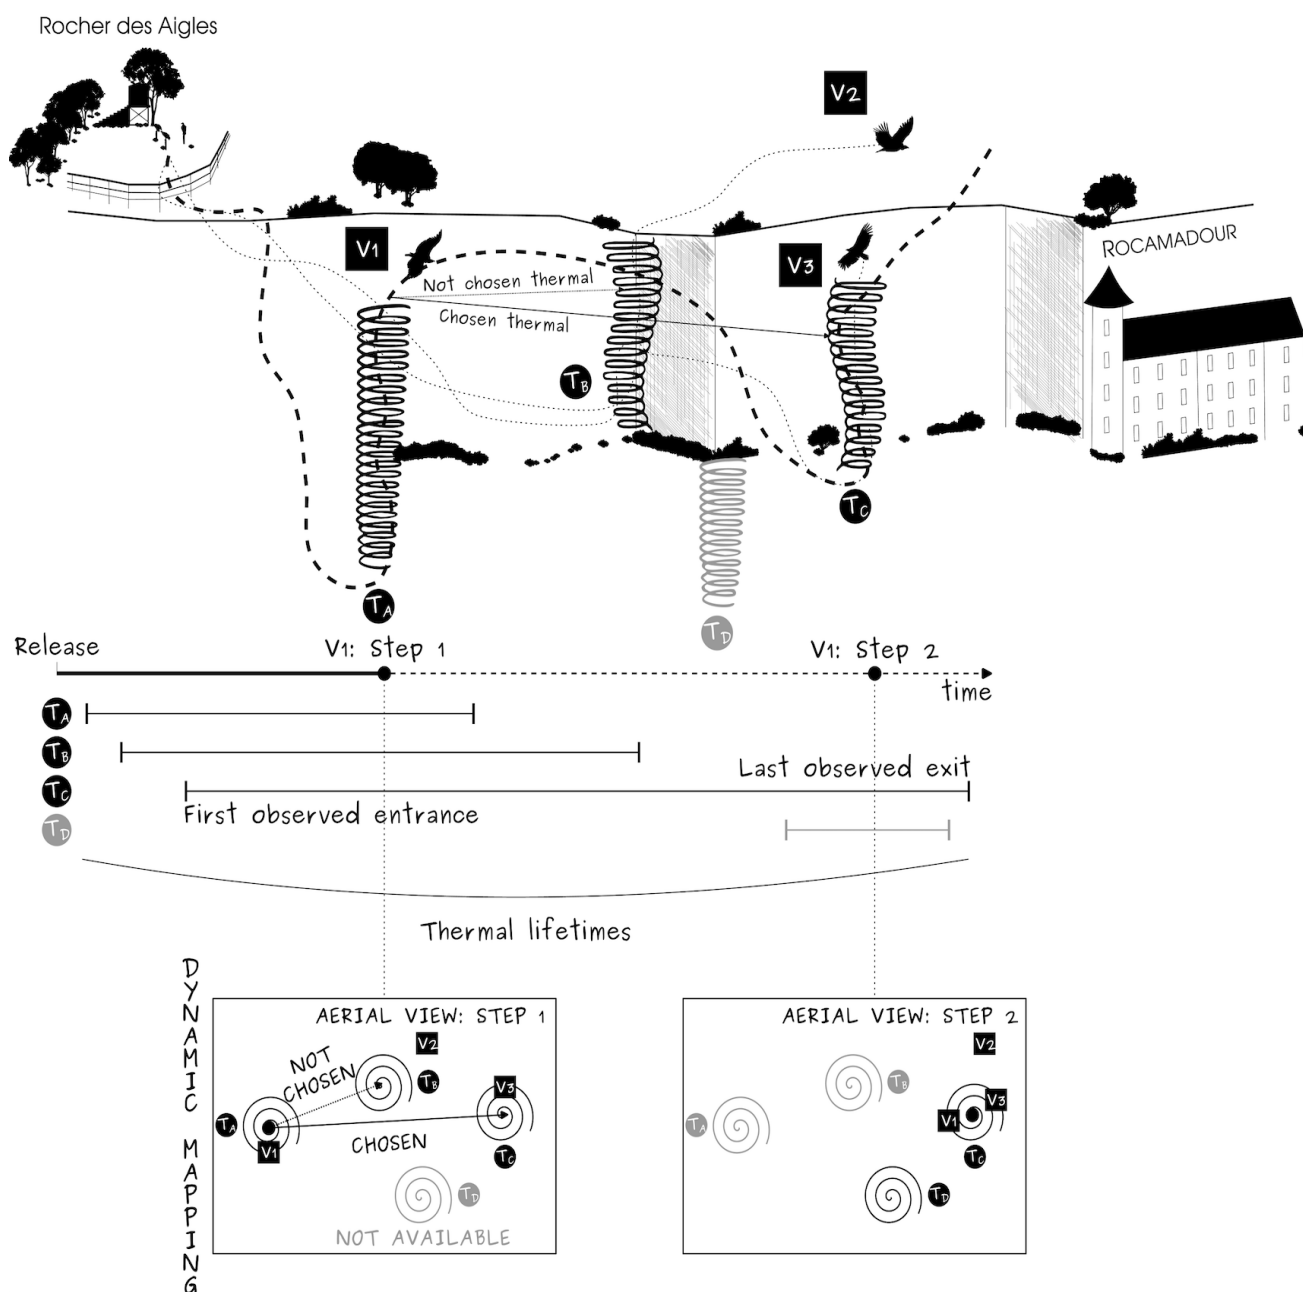

471 **Figure 3. Illustration of the step selection framework used to investigate thermal**  
 472 **selection.** We focused on the movement of vultures released from the Rocher des Aigles when  
 473 flying from thermal to thermal (i.e. a step). To do this, we mapped each thermal used during a  
 474 flight session based on movement segmentation and clustering (see method section) to create  
 475 dynamic maps of thermal availability over the flight session (as represented by the aerial  
 476 views). The illustrated example focuses on the decision of a vulture (V<sub>1</sub>; step 1) when leaving  
 477 the thermal (T<sub>A</sub>) and having to choose between two available thermals (T<sub>B</sub>, close but not  
 478 currently used by another vulture, and T<sub>C</sub>, further away but currently used by another  
 479 individual). T<sub>D</sub> was not available until step 2, when it was discovered and used by another  
 480 individual, and is therefore shown in grey at step 1. At step 2, V<sub>1</sub> joined V<sub>3</sub> in T<sub>C</sub> and both

481 thermals  $T_A$  and  $T_B$  were no longer available. A thermal was available from the moment when  
482 the first individual entered it until the last individual left it. Therefore, the number of available  
483 thermals could change during the flight session (see differences between maps in step 1 and 2).

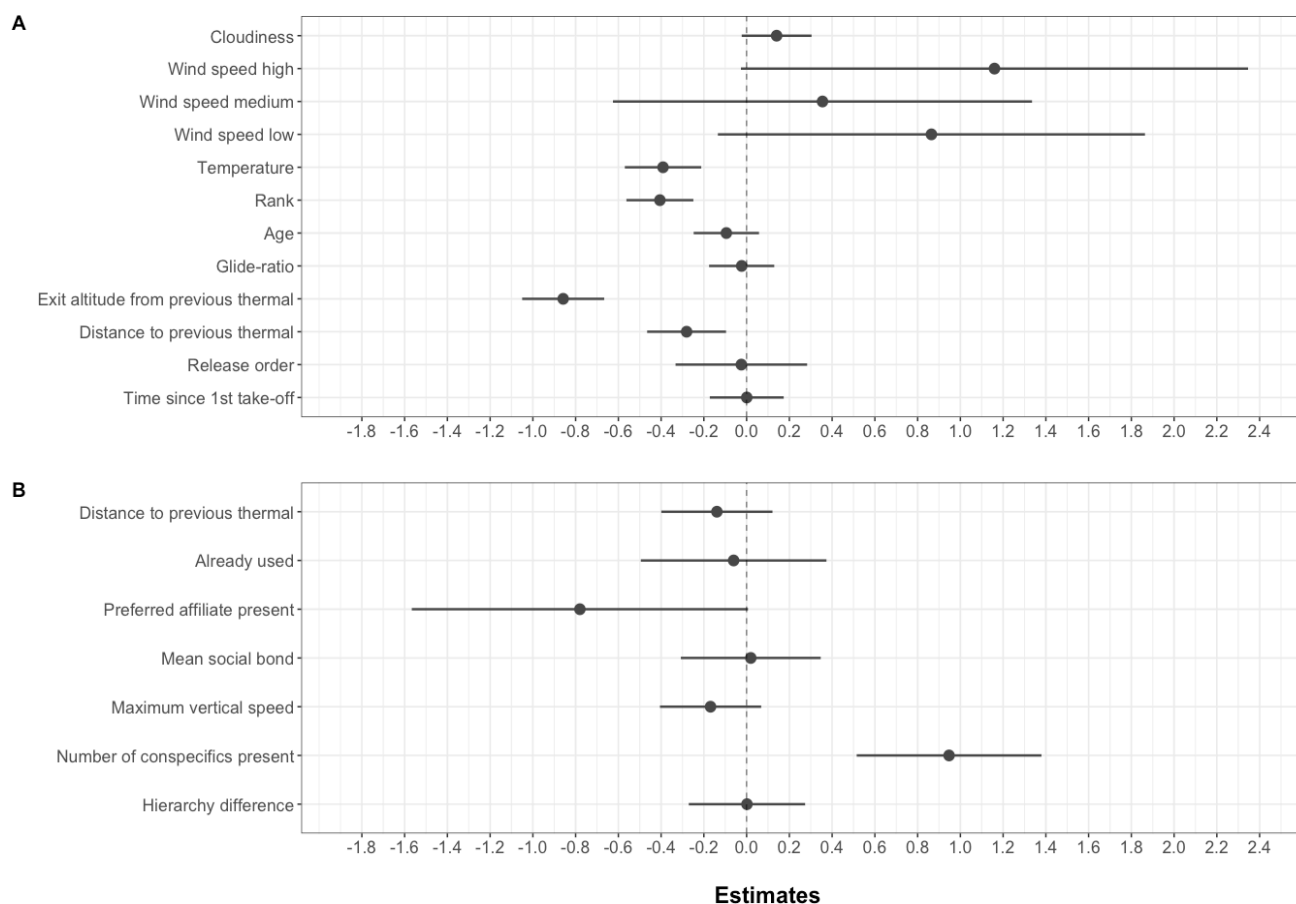

484 **Figure 4. Estimates of models investigating the drivers of social information use (A) and**  
485 **thermal selection (B).** Rows correspond to each predictor. Each point represents the  
486 standardised estimate value. Segments give the associated 95% confidence intervals.

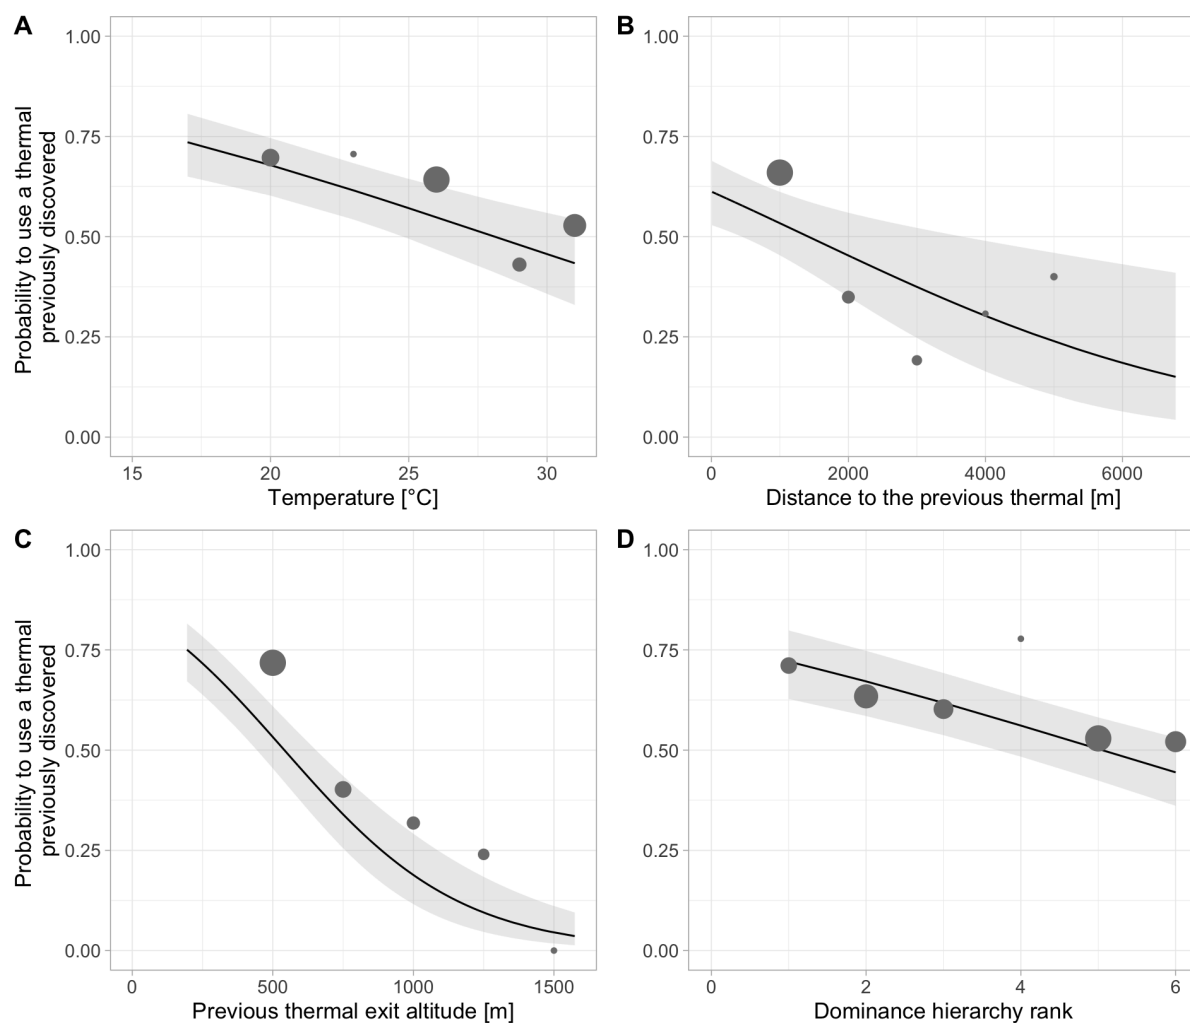

487 **Figure 5. The probability to use a thermal already discovered by conspecifics decreases**  
488 **with temperature, distance to the thermal, flight altitude and hierarchy rank.** Points  
489 represent the probability of using a thermal already discovered by a conspecific, estimated on  
490 the raw data. Their size is relative to the sample size. To do so, for (A), (B) and (C), predictors  
491 were binned. Black lines with grey shades show the GLMM estimated probability with its 95%  
492 confidence interval (N = 1098 thermals).

## 493 Reference

- 494 1. Dall SRX, Giraldeau L-A, Olsson O, McNamara JM, Stephens DW. 2005 Information and  
495 its use by animals in evolutionary ecology. *Trends Ecol. Evol.* **20**, 187–193.  
496 (doi:10.1016/j.tree.2005.01.010)
- 497 2. Shettleworth SJ, Krebs JR, Horn G. 1997 Spatial memory in food-storing birds. *Philos.*  
498 *Trans. R. Soc. Lond. B. Biol. Sci.* **329**, 143–151. (doi:10.1098/rstb.1990.0159)
- 499 3. Valone TJ. 2007 From eavesdropping on performance to copying the behavior of others:  
500 a review of public information use. *Behav. Ecol. Sociobiol.* **62**, 1–14.  
501 (doi:10.1007/s00265-007-0439-6)
- 502 4. Danchin É, Giraldeau L-A, Valone TJ, Wagner RH. 2004 Public Information: From Nosy  
503 Neighbors to Cultural Evolution. *Science* **305**, 487–491. (doi:10.1126/science.1098254)
- 504 5. Thiebault A, Mullers R, Pistorius P, Meza-Torres MA, Dubroca L, Green D, Tremblay Y.  
505 2014 From colony to first patch: Processes of prey searching and social information in  
506 Cape Gannets. *The Auk* **131**, 595–609. (doi:10.1642/AUK-13-209.1)
- 507 6. Fawcett TW, Fallenstein B, Higginson AD, Houston AI, Mallpress DEW, Trimmer PC,  
508 McNamara JM. 2014 The evolution of decision rules in complex environments. *Trends*  
509 *Cogn. Sci.* **18**, 153–161. (doi:10.1016/j.tics.2013.12.012)
- 510 7. Flack A, Pettit B, Freeman R, Guilford T, Biro D. 2012 What are leaders made of? The  
511 role of individual experience in determining leader–follower relations in homing pigeons.  
512 *Anim. Behav.* **83**, 703–709. (doi:10.1016/j.anbehav.2011.12.018)
- 513 8. McComb K, Shannon G, Durant SM, Sayialel K, Slotow R, Poole J, Moss C. 2011  
514 Leadership in elephants: the adaptive value of age. *Proc. R. Soc. B Biol. Sci.* **278**, 3270–  
515 3276. (doi:10.1098/rspb.2011.0168)
- 516 9. Strandburg-Peshkin A, Farine DR, Couzin ID, Crofoot MC. 2015 Shared decision-  
517 making drives collective movement in wild baboons. *Science* **348**, 1358–1361.  
518 (doi:10.1126/science.aaa5099)
- 519 10. Bode NWF, Wood AJ, Franks DW. 2011 The impact of social networks on animal  
520 collective motion. *Anim. Behav.* **82**, 29–38. (doi:10.1016/j.anbehav.2011.04.011)
- 521 11. King AJ, Sueur C, Huchard E, Cowlshaw G. 2011 A rule-of-thumb based on social  
522 affiliation explains collective movements in desert baboons. *Anim. Behav.* **82**, 1337–  
523 1345. (doi:10.1016/j.anbehav.2011.09.017)
- 524 12. Farine DR, Strandburg-Peshkin A, Berger-Wolf T, Ziebart B, Brugere I, Li J, Crofoot MC.  
525 2016 Both Nearest Neighbours and Long-term Affiliates Predict Individual Locations  
526 During Collective Movement in Wild Baboons. *Sci. Rep.* **6**, 27704.  
527 (doi:10.1038/srep27704)
- 528 13. Dunlap AS, Nielsen ME, Dornhaus A, Papaj DR. 2016 Foraging Bumble Bees Weigh the  
529 Reliability of Personal and Social Information. *Curr. Biol.* **26**, 1195–1199.  
530 (doi:10.1016/j.cub.2016.03.009)
- 531 14. Rafacz M, Templeton JJ. 2003 Environmental Unpredictability and the Value of Social  
532 Information for Foraging Starlings. *Ethology* **109**, 951–960. (doi:10.1046/j.0179-  
533 1613.2003.00935.x)
- 534 15. Williams HJ, Safi K. 2021 Certainty and integration of options in animal movement.  
535 *Trends Ecol. Evol.* **36**, 990–999. (doi:10.1016/j.tree.2021.06.013)
- 536 16. Lee AEG, Ounsley JP, Coulson T, Rowcliffe JM, Cowlshaw G. 2016 Information use  
537 and resource competition: an integrative framework. *Proc. R. Soc. B Biol. Sci.* **283**,  
538 20152550. (doi:10.1098/rspb.2015.2550)
- 539 17. Rubenstein D I. 1982 Risk, uncertainty and evolutionary strategies. *Curr. Probl.*  
540 *Sociobiol.* , 91–111.
- 541 18. Stillman RA, Caldow RWG, Goss-Custard JD, Alexander MJ. 2000 Individual variation in  
542 intake rate: the relative importance of foraging efficiency and dominance. *J. Anim. Ecol.*  
543 **69**, 484–493. (doi:10.1046/j.1365-2656.2000.00410.x)
- 544 19. Goss-custard JD, Cayford JT, Lea SEG. 1998 The changing trade-off between food

- 545 finding and food stealing in juvenile oystercatchers. *Anim. Behav.* **55**, 745–760.  
546 (doi:10.1006/anbe.1997.0680)
- 547 20. Pennycuik CJ. 1972 Soaring behaviour and performance of some East African birds  
548 observed from a motor glider. *Ibis* **114**, 178–218.
- 549 21. Scacco M, Flack A, Duriez O, Wikelski M, Safi K. 2019 Static landscape features predict  
550 uplift locations for soaring birds across Europe. *R. Soc. Open Sci.* **6**, 181440.  
551 (doi:10.1098/rsos.181440)
- 552 22. Alarcón PAE, Morales JM, Donázar JA, Sánchez-Zapata JA, Hiraldo F, Lambertucci SA.  
553 2017 Sexual-size dimorphism modulates the trade-off between exploiting food and wind  
554 resources in a large avian scavenger. *Sci. Rep.* **7**, 11461. (doi:10.1038/s41598-017-  
555 11855-0)
- 556 23. Horvitz N, Sapir N, Liechti F, Avissar R, Mahrer I, Nathan R. 2014 The gliding speed of  
557 migrating birds: slow and safe or fast and risky? *Ecol. Lett.* **17**, 670–679.  
558 (doi:10.1111/ele.12268)
- 559 24. Duriez O, Kato A, Tromp C, Dell’Omo G, Vyssotski AL, Sarrazin F, Ropert-Coudert Y.  
560 2014 How Cheap Is Soaring Flight in Raptors? A Preliminary Investigation in Freely-  
561 Flying Vultures. *PLoS ONE* **9**, e84887. (doi:10.1371/journal.pone.0084887)
- 562 25. Jackson AL, Ruxton GD, Houston DC. 2008 The effect of social facilitation on foraging  
563 success in vultures: a modelling study. *Biol. Lett.* **4**, 311–313.  
564 (doi:10.1098/rsbl.2008.0038)
- 565 26. Cortés-Avizanda A, Jovani R, Donázar JA, Grimm V. 2014 Bird sky networks: How do  
566 avian scavengers use social information to find carrion? *Ecology* **95**, 1799–1808.  
567 (doi:10.1890/13-0574.1)
- 568 27. Bosè M, Duriez O, Sarrazin F. 2012 Intra-specific competition in foraging Griffon  
569 Vultures *Gyps fulvus*: 1. Dynamics of group feeding. *Bird Study* **59**, 182–192.  
570 (doi:10.1080/00063657.2012.658639)
- 571 28. Moreno-Opo R, Trujillano A, Margalida A. 2015 Optimization of supplementary feeding  
572 programs for European vultures depends on environmental and management factors.  
573 *Ecosphere* **6**, art127. (doi:10.1890/es15-00009.1)
- 574 29. Williams HJ, King AJ, Duriez O, Börger L, Shepard ELC. 2018 Social eavesdropping  
575 allows for a more risky gliding strategy by thermal-soaring birds. *J. R. Soc. Interface* **15**,  
576 20180578. (doi:10.1098/rsif.2018.0578)
- 577 30. Bosè M, Sarrazin F. 2007 Competitive behaviour and feeding rate in a reintroduced  
578 population of Griffon Vultures *Gyps fulvus*: Competition for food in Griffon Vultures. *Ibis*  
579 **149**, 490–501. (doi:10.1111/j.1474-919X.2007.00674.x)
- 580 31. Kirk DA, Houston DC. 1995 Social dominance in migrant and resident turkey vultures at  
581 carcasses: evidence for a despotic distribution? *Behav. Ecol. Sociobiol.* **36**, 323–332.  
582 (doi:10.1007/BF00167793)
- 583 32. Donázar JA, Travaini A, Ceballos O, Rodríguez A, Delibes M, Hiraldo F. 1999 Effects of  
584 sex-associated competitive asymmetries on foraging group structure and despotic  
585 distribution in Andean condors. *Behav. Ecol. Sociobiol.* **45**, 55–65.  
586 (doi:10.1007/s002650050539)
- 587 33. van Overveld T, García-Alfonso M, Dingemanse NJ, Bouten W, Gangoso L, de la Riva  
588 M, Serrano D, Donázar JA. 2018 Food predictability and social status drive individual  
589 resource specializations in a territorial vulture. *Sci. Rep.* **8**, 15155. (doi:10.1038/s41598-  
590 018-33564-y)
- 591 34. Duriez O, Herman S, Sarrazin F. 2012 Intra-specific competition in foraging Griffon  
592 Vultures *Gyps fulvus*: 2. The influence of supplementary feeding management. *Bird  
593 Study* **59**, 193–206. (doi:10.1080/00063657.2012.658640)
- 594 35. Moreno-Opo R, Trujillano A, Margalida A. 2016 Behavioral coexistence and feeding  
595 efficiency drive niche partitioning in European avian scavengers. *Behav. Ecol.* **27**, 1041–  
596 1052. (doi:10.1093/beheco/arw010)
- 597 36. Kohn GM, Meredith GR, Magdaleno FR, King AP, West MJ. 2015 Sex differences in  
598 familiarity preferences within fission–fusion brown-headed cowbird, *Molothrus ater*,  
599 flocks. *Anim. Behav.* **106**, 137–143. (doi:10.1016/j.anbehav.2015.05.023)



- 600 37. Voelkl B, Fritz J. 2017 Relation between travel strategy and social organization of  
601 migrating birds with special consideration of formation flight in the northern bald ibis.  
602 *Philos. Trans. R. Soc. B Biol. Sci.* **372**, 20160235. (doi:10.1098/rstb.2016.0235)  
603 38. Utne-Palm AC, Hart PJB. 2000 The effects of familiarity on competitive interactions  
604 between threespined sticklebacks. *Oikos* **91**, 225–232.  
605 (doi:<https://doi.org/10.1034/j.1600-0706.2000.910203.x>)  
606 39. Fluhr J, Benhamou S, Peyrusque D, Duriez O. 2021 Space Use and Time Budget in  
607 Two Populations of Griffon Vultures in Contrasting Landscapes. *J. Raptor Res.* **55**, 425–  
608 437. (doi:10.3356/JRR-20-14)  
609 40. Bezanson J, Karpinski S, Shah VB, Edelman A. 2012 Julia: A Fast Dynamic Language  
610 for Technical Computing. (doi:10.48550/arXiv.1209.5145)  
611 41. R Core Team. 2022 R: A language and environment for statistical computing. R  
612 Foundation for Statistical Computing, Vienna, Austria.  
613 42. Whitehead H. 2008 *Analyzing Animal Societies: Quantitative Methods for Vertebrate*  
614 *Social Analysis*. University of Chicago Press.  
615 43. Hoppitt WJE, Farine DR. 2018 Association indices for quantifying social relationships:  
616 how to deal with missing observations of individuals or groups. *Anim. Behav.* **136**, 227–  
617 238. (doi:10.1016/j.anbehav.2017.08.029)  
618 44. Elo AE. 1978 *The rating of chessplayers, past and present*. Arco Publication. New York.  
619 45. Sánchez-Tójar A, Schroeder J, Farine DR. 2018 A practical guide for inferring reliable  
620 dominance hierarchies and estimating their uncertainty. *J. Anim. Ecol.* **87**, 594–608.  
621 (doi:10.1111/1365-2656.12776)  
622 46. Farine D, Sánchez-Tójar. 2018 aniDom: inferring dominance hierarchies and estimating  
623 uncertainty.  
624 47. Drews C. 1993 The Concept and Definition of Dominance in Animal Behaviour.  
625 *Behaviour* **125**, 283–313. (doi:10.1163/156853993X00290)  
626 48. Friard O, Gamba M. 2016 BORIS: a free, versatile open-source event-logging software  
627 for video/audio coding and live observations. *Methods Ecol. Evol.* **7**, 1325–1330.  
628 (doi:10.1111/2041-210X.12584)  
629 49. Valverde JA. 1959 Moyens d'expression et hiérarchie sociale chez le vautour fauve  
630 *Gyps fulvus*. *Alauda* **1**, 1–15.  
631 50. Anderson D *et al.* 2020 A practical guide to methods for attaching research devices to  
632 vultures and condors. (doi:10.17863/CAM.58032)  
633 51. Kranstauber B, Smolla M, Scharf AK. 2018 move: Visualizing and analyzing animal track  
634 data. R package version 3.1.0.  
635 52. Williams HJ, Shepard ELC, Duriez O, Lambertucci SA. 2015 Can accelerometry be used  
636 to distinguish between flight types in soaring birds? *Anim. Biotelemetry* **3**, 45.  
637 (doi:10.1186/s40317-015-0077-0)  
638 53. Khosravifard S, Venus V, Skidmore AK, Bouten W, Muñoz AR, Toxopeus AG. 2018  
639 Identification of Griffon Vulture's Flight Types Using High-Resolution Tracking Data. *Int.*  
640 *J. Environ. Res.* **12**, 313–325. (doi:10.1007/s41742-018-0093-z)  
641 54. Hahsler M, Piekenbrock M, Arya S, Mount D. 2017 Dbscan: density based clustering of  
642 applications with noise (DBSCAN) and related algorithms.  
643 55. Williams HJ, Duriez O, Holton MD, Dell'Omo G, Wilson RP, Shepard ELC. 2018 Vultures  
644 respond to challenges of near-ground thermal soaring by varying bank angle. *J. Exp.*  
645 *Biol.* **221**, jeb174995. (doi:10.1242/jeb.174995)  
646 56. Bolker BM, Brooks ME, Clark CJ, Geange SW, Poulsen JR, Stevens MHH, White J-SS.  
647 2009 Generalized linear mixed models: a practical guide for ecology and evolution.  
648 *Trends Ecol. Evol.* **24**, 127–135. (doi:10.1016/j.tree.2008.10.008)  
649 57. Schielzeth H. 2010 Simple means to improve the interpretability of regression  
650 coefficients. *Methods Ecol. Evol.* **1**, 103–113. (doi:[https://doi.org/10.1111/j.2041-](https://doi.org/10.1111/j.2041-210X.2010.00012.x)  
651 [210X.2010.00012.x](https://doi.org/10.1111/j.2041-210X.2010.00012.x))  
652 58. Hartig F, Lohse L. 2020 DHARMA: Residual Diagnostics for Hierarchical (Multi-Level /  
653 Mixed) Regression Models.  
654 59. Zuur AF, Ieno EN, Elphick CS. 2010 A protocol for data exploration to avoid common

- 655 statistical problems. *Methods Ecol. Evol.* **1**, 3–14. (doi:[https://doi.org/10.1111/j.2041-](https://doi.org/10.1111/j.2041-210X.2009.00001.x)  
656 [210X.2009.00001.x](https://doi.org/10.1111/j.2041-210X.2009.00001.x))
- 657 60. Nakagawa S, Schielzeth H. 2013 A general and simple method for obtaining R<sup>2</sup> from  
658 generalized linear mixed-effects models. *Methods Ecol. Evol.* **4**, 133–142.  
659 (doi:<https://doi.org/10.1111/j.2041-210x.2012.00261.x>)
- 660 61. Thurfjell H, Ciuti S, Boyce MS. 2014 Applications of step-selection functions in ecology  
661 and conservation. *Mov. Ecol.* **2**, 4. (doi:10.1186/2051-3933-2-4)
- 662 62. Avgar T, Lele SR, Keim JL, Boyce MS. 2017 Relative Selection Strength: Quantifying  
663 effect size in habitat- and step-selection inference. *Ecol. Evol.* **7**, 5322–5330.  
664 (doi:10.1002/ece3.3122)
- 665 63. Fieberg J, Signer J, Smith B, Avgar T. 2021 A ‘How to’ guide for interpreting parameters  
666 in habitat-selection analyses. *J. Anim. Ecol.* **90**, 1027–1043. (doi:10.1111/1365-  
667 [2656.13441](https://doi.org/10.1111/1365-2656.13441))
- 668 64. Webster MM, Laland KN. 2012 Social information, conformity and the opportunity costs  
669 paid by foraging fish. *Behav. Ecol. Sociobiol.* **66**, 797–809. (doi:10.1007/s00265-012-  
670 [1328-1](https://doi.org/10.1007/s00265-012-1328-1))
- 671 65. Barnard CJ, Sibly RM. 1981 Producers and scroungers: A general model and its  
672 application to captive flocks of house sparrows. *Anim. Behav.* **29**, 543–550.  
673 (doi:10.1016/S0003-3472(81)80117-0)
- 674 66. Barta Z, Giraldeau L-A. 1998 The effect of dominance hierarchy on the use of alternative  
675 foraging tactics: a phenotype-limited producing-scrounging game. *Behav. Ecol.*  
676 *Sociobiol.* **42**, 217–223. (doi:10.1007/s002650050433)
- 677 67. Stahl J, Tolsma PH, Loonen MJJE, Drent RH. 2001 Subordinates explore but dominants  
678 profit: resource competition in high Arctic barnacle goose flocks. *Anim. Behav.* **61**, 257–  
679 264. (doi:10.1006/anbe.2000.1564)
- 680 68. Liker A, Barta Z. 2002 THE EFFECTS OF DOMINANCE ON SOCIAL FORAGING  
681 TACTIC USE IN HOUSE SPARROWS. *Behaviour* **139**, 1061–1076.  
682 (doi:10.1163/15685390260337903)
- 683 69. Alonso JC, Bautista LM, Alonso JA. 1997 Dominance and the dynamics of phenotype-  
684 limited distribution in common cranes. *Behav. Ecol. Sociobiol.* **40**, 401–408.  
685 (doi:10.1007/s002650050356)
- 686 70. Papageorgiou D, Farine DR. 2020 Shared decision-making allows subordinates to lead  
687 when dominants monopolize resources. *Sci. Adv.* **6**, eaba5881.  
688 (doi:10.1126/sciadv.aba5881)
- 689 71. Kendal R, Hopper LM, Whiten A, Brosnan SF, Lambeth SP, Schapiro SJ, Hoppitt W.  
690 2015 Chimpanzees copy dominant and knowledgeable individuals: implications for  
691 cultural diversity. *Evol. Hum. Behav.* **36**, 65–72.  
692 (doi:10.1016/j.evolhumbehav.2014.09.002)
- 693 72. Laland KN. 2004 Social learning strategies. *Anim. Learn. Behav.* **32**, 4–14.  
694 (doi:10.3758/BF03196002)
- 695 73. Riotte-Lambert L, Matthiopoulos J. 2020 Environmental Predictability as a Cause and  
696 Consequence of Animal Movement. *Trends Ecol. Evol.* **35**, 163–174.  
697 (doi:10.1016/j.tree.2019.09.009)
- 698 74. Bradbury T. 1989 *Meteorology and flight: a pilot's guide to weather*. A&C Black.
- 699 75. Shannon HD, Young GS, Yates MA, Fuller MR, Seegar WS. 2002 American White  
700 Pelican Soaring Flight Times and Altitudes Relative to Changes in Thermal Depth and  
701 Intensity. *The Condor* **104**, 679–683. (doi:10.1093/condor/104.3.679)
- 702 76. Shamoun-Baranes J, Baharad A, Alpert P, Berthold P, Yom-Tov Y, Dvir Y, Leshem Y.  
703 2003 The effect of wind, season and latitude on the migration speed of white storks  
704 *Ciconia ciconia*, along the eastern migration route. *J. Avian Biol.* **34**, 97–104.  
705 (doi:10.1034/j.1600-048X.2003.03079.x)
- 706 77. Shamoun-Baranes J, Bouten W, van Loon EE, Meijer C, Camphuysen CJ. 2016 Flap or  
707 soar? How a flight generalist responds to its aerial environment. *Philos. Trans. R. Soc. B*  
708 *Biol. Sci.* **371**, 20150395. (doi:10.1098/rstb.2015.0395)
- 709 78. Kerlinger P, Gauthreaux SA. 1984 Flight behaviour of sharp-shinned hawks during

- 710 migration. I : Over land. *Anim. Behav.* **32**, 1021–1028. (doi:10.1016/S0003-  
711 3472(84)80216-X)
- 712 79. Shepard ELC. 2022 Energy economy in flight. *Curr. Biol.* **32**, R672–R675.  
713 (doi:10.1016/j.cub.2022.02.004)
- 714 80. Williams HJ, Shepard ELC, Holton MD, Alarcón PAE, Wilson RP, Lambertucci SA. 2020  
715 Physical limits of flight performance in the heaviest soaring bird. *Proc. Natl. Acad. Sci.*  
716 **117**, 17884–17890. (doi:10.1073/pnas.1907360117)
- 717 81. Harel R *et al.* 2016 Decision-making by a soaring bird: time, energy and risk  
718 considerations at different spatio-temporal scales. *Philos. Trans. R. Soc. B Biol. Sci.*  
719 **371**, 20150397. (doi:10.1098/rstb.2015.0397)
- 720 82. Harel R, Horvitz N, Nathan R. 2016 Adult vultures outperform juveniles in challenging  
721 thermal soaring conditions. *Sci. Rep.* **6**, 27865. (doi:10.1038/srep27865)
- 722 83. Dugatkin LA, Godin J-GJ. 1993 Female mate copying in the guppy (*Poecilia reticulata*):  
723 age-dependent effects. *Behav. Ecol.* **4**, 289–292. (doi:10.1093/beheco/4.4.289)
- 724 84. Palacios-Romo TM, Castellanos F, Ramos-Fernandez G. 2019 Uncovering the decision  
725 rules behind collective foraging in spider monkeys. *Anim. Behav.* **149**, 121–133.  
726 (doi:10.1016/j.anbehav.2019.01.011)
- 727 85. Baciadonna L, McElligott AG, Briefer EF. 2013 Goats favour personal over social  
728 information in an experimental foraging task. *PeerJ* **1**, e172. (doi:10.7717/peerj.172)
- 729 86. Heinen VK, Stephens DW. 2016 Blue jays, *Cyanocitta cristata*, devalue social  
730 information in uncertain environments. *Anim. Behav.* **112**, 53–62.  
731 (doi:10.1016/j.anbehav.2015.11.015)
- 732 87. Leadbeater E, Florent C. 2014 Foraging bumblebees do not rate social information  
733 above personal experience. *Behav. Ecol. Sociobiol.* **68**, 1145–1150.  
734 (doi:10.1007/s00265-014-1725-8)
- 735 88. Grüter C, Czaczkes TJ, Ratnieks FLW. 2011 Decision making in ant foragers (*Lasius*  
736 *niger*) facing conflicting private and social information. *Behav. Ecol. Sociobiol.* **65**, 141–  
737 148. (doi:10.1007/s00265-010-1020-2)
- 738 89. Biro D, Inoue-Nakamura N, Tonooka R, Yamakoshi G, Sousa C, Matsuzawa T. 2003  
739 Cultural innovation and transmission of tool use in wild chimpanzees: evidence from field  
740 experiments. *Anim. Cogn.* **6**, 213–223. (doi:10.1007/s10071-003-0183-x)
- 741 90. Reddy G, Celani A, Sejnowski TJ, Vergassola M. 2016 Learning to soar in turbulent  
742 environments. *Proc. Natl. Acad. Sci.* **113**, E4877–E4884.  
743 (doi:10.1073/pnas.1606075113)
- 744 91. Westbrook JK, Eyster RS. 2017 Atmospheric Environment Associated with Animal  
745 Flight. In *Aeroecology* (eds PB Chilson, WF Frick, JF Kelly, F Liechti), pp. 13–45. Cham:  
746 Springer International Publishing. (doi:10.1007/978-3-319-68576-2\_2)
- 747 92. King AJ, Cowlshaw G. 2007 When to use social information: the advantage of large  
748 group size in individual decision making. *Biol. Lett.* **3**, 137–139.  
749 (doi:10.1098/rsbl.2007.0017)
- 750 93. Sharma N, Anglister N, Spiegel O, Pinter-Wollman N. 2022 Social situations differ in  
751 their contribution to population-level social structure in griffon vultures.  
752 (doi:10.22541/au.165107196.66953827/v1)
- 753 94. Nagy M, Couzin ID, Fiedler W, Wikelski M, Flack A. 2018 Synchronization, coordination  
754 and collective sensing during thermalling flight of freely migrating white storks. *Philos.*  
755 *Trans. R. Soc. B Biol. Sci.* **373**, 20170011. (doi:10.1098/rstb.2017.0011)
- 756 95. van Loon EE, Shamoun-Baranes J, Bouten W, Davis SL. 2011 Understanding soaring  
757 bird migration through interactions and decisions at the individual level. *J. Theor. Biol.*  
758 **270**, 112–126. (doi:10.1016/j.jtbi.2010.10.038)
- 759 96. Fernández-Juricic E, Kacelnik A. 2004 Information transfer and gain in flocks: the effects  
760 of quality and quantity of social information at different neighbour distances. *Behav.*  
761 *Ecol. Sociobiol.* **55**, 502–511. (doi:10.1007/s00265-003-0698-9)
- 762 97. Bose T, Reina A, Marshall JA. 2017 Collective decision-making. *Curr. Opin. Behav. Sci.*  
763 **16**, 30–34. (doi:10.1016/j.cobeha.2017.03.004)
- 764 98. Kane A, Jackson AL, Ogada DL, Monadjem A, McNally L. 2014 Vultures acquire

- 765 information on carcass location from scavenging eagles. *Proc. R. Soc. B Biol. Sci.* **281**,  
766 20141072. (doi:10.1098/rspb.2014.1072)
- 767 99. Hedrick TL, Pichot C, de Margerie E. 2018 Gliding for a free lunch: biomechanics of  
768 foraging flight in common swifts (*Apus apus*). *J. Exp. Biol.* **221**, jeb186270.  
769 (doi:10.1242/jeb.186270)
- 770 100. Santos CD, Hanssen F, Muñoz A-R, Onrubia A, Wikelski M, May R, Silva JP. 2017  
771 Match between soaring modes of black kites and the fine-scale distribution of updrafts.  
772 *Sci. Rep.* **7**, 6421. (doi:10.1038/s41598-017-05319-8)
- 773 101. Tremblay Y, Thiebault A, Mullers R, Pistorius P. 2014 Bird-Borne Video-Cameras Show  
774 That Seabird Movement Patterns Relate to Previously Unrevealed Proximate  
775 Environment, Not Prey. *PLOS ONE* **9**, e88424. (doi:10.1371/journal.pone.0088424)
- 776 102. Robira B, Perez-Lamarque B. 2023 Primate sympatry shapes the evolution of their brain  
777 architecture. *Peer Community J.* **3**. (doi:10.24072/pcjournal.259)
